# Supplementary material
Source: Royal Society of Chemistry journal article supplement (doi:10.1039/d6cp01484d)
Supplement: d6cp01484d1.pdf [file d6cp01484d1.pdf]

## Supporting Information

### Role of Unsaturation in Governing Synergistic Micellization and Interaction Energetics in Ionic Liquid–Fatty Acid Systems

P. Rajput<sup>1</sup>, J. Kashiyani<sup>1</sup>, V. Prajapati<sup>2</sup>, U. Dani<sup>3</sup>, J.K. Barot<sup>4</sup>, V. Patel<sup>5\*</sup>, M. Khimani<sup>6</sup>, J.K. Parikh<sup>7</sup>, K. Kuperkar<sup>2</sup>, P. Parekh<sup>1\*</sup>

<sup>1</sup>*Department of Chemistry, Veer Narmad South Gujarat University, Surat-395007, Gujarat, India*

<sup>2</sup>*Department of Chemistry, Sardar Vallabhbhai National Institute of Technology, Surat-395007, Gujarat, India*

<sup>3</sup>*Department of Zoology, B. P. Baria Science Institute, Navsari-396445, Gujarat, India*

<sup>4</sup>*Department of Bioscience, Veer Narmad South Gujarat University, Surat-395007, Gujarat, India*

<sup>5</sup>*Department of Chemistry, Navyug Science College, Surat-395009, Gujarat, India*

<sup>6</sup>*Green up Creation Private Limited, Parle Point, Surat, Gujarat, India*

<sup>7</sup>*Department of Chemical Engineering, Sardar Vallabhbhai National Institute of Technology, Surat-395007, Gujarat, India*

**\*Corresponding author:** Dr. Paresh Parekh

Email ID: [paresh7884@gmail.com](mailto:paresh7884@gmail.com), [pyparekh@vnsgu.ac.in](mailto:pyparekh@vnsgu.ac.in)

Vijay I. Patel: [vijaypatel4686@gmail.com](mailto:vijaypatel4686@gmail.com)

Pratibha Rajput: [pratibha.singh.73113528@gmail.com](mailto:pratibha.singh.73113528@gmail.com)

Jainika Kashiyani: [jainikashiyani.241@gmail.com](mailto:jainikashiyani.241@gmail.com)

Virendra Prajapati: [virenprajapati75@yahoo.com](mailto:virenprajapati75@yahoo.com)

Unnati Dani: [daniunnati17@gmail.com](mailto:daniunnati17@gmail.com)

Jagruti Barot: [jkbarot@vnsgu.ac.in](mailto:jkbarot@vnsgu.ac.in)

Vijay I. Patel: [vijaypatel4686@gmail.com](mailto:vijaypatel4686@gmail.com)

Mehul Khimani: [khimani\\_mehul@yahoo.com](mailto:khimani_mehul@yahoo.com)

Jigisha K. Parikh: [jk\\_parikh@yahoo.co.in](mailto:jk_parikh@yahoo.co.in)

Ketan Kuperkar: [ketankuperkar@gmail.com](mailto:ketankuperkar@gmail.com)

Paresh Y. Parekh: [paresh7884@gmail.com](mailto:paresh7884@gmail.com)

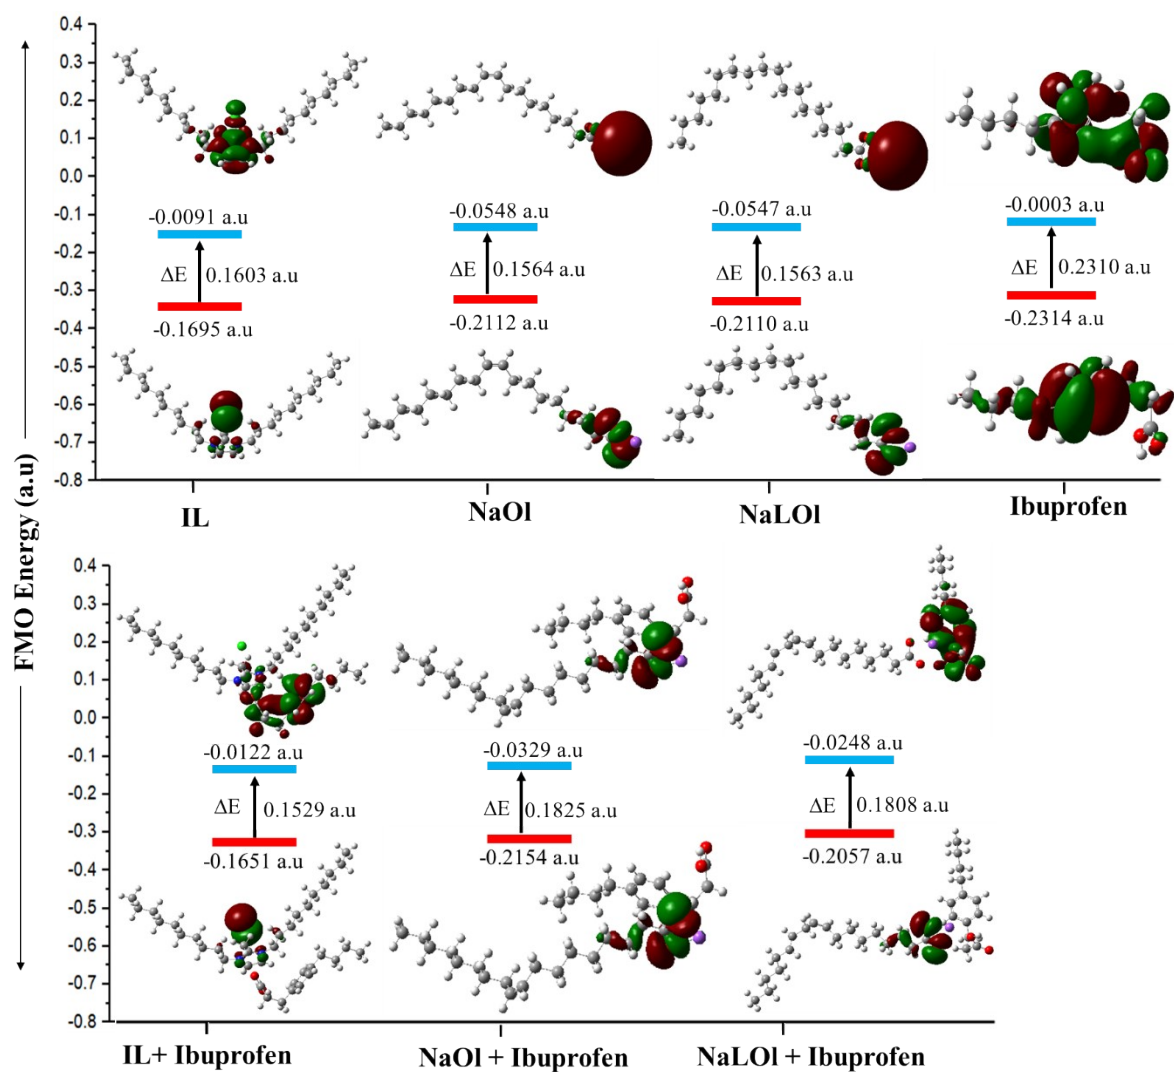

**Figure S1. Frontier molecular orbitals (FMOs) and energy levels for the highest occupied molecular orbitals (HOMOs) (*bottom*) and the lowest unoccupied molecular orbitals (LUMOs) (*top*) of the examined isolate system templates.**



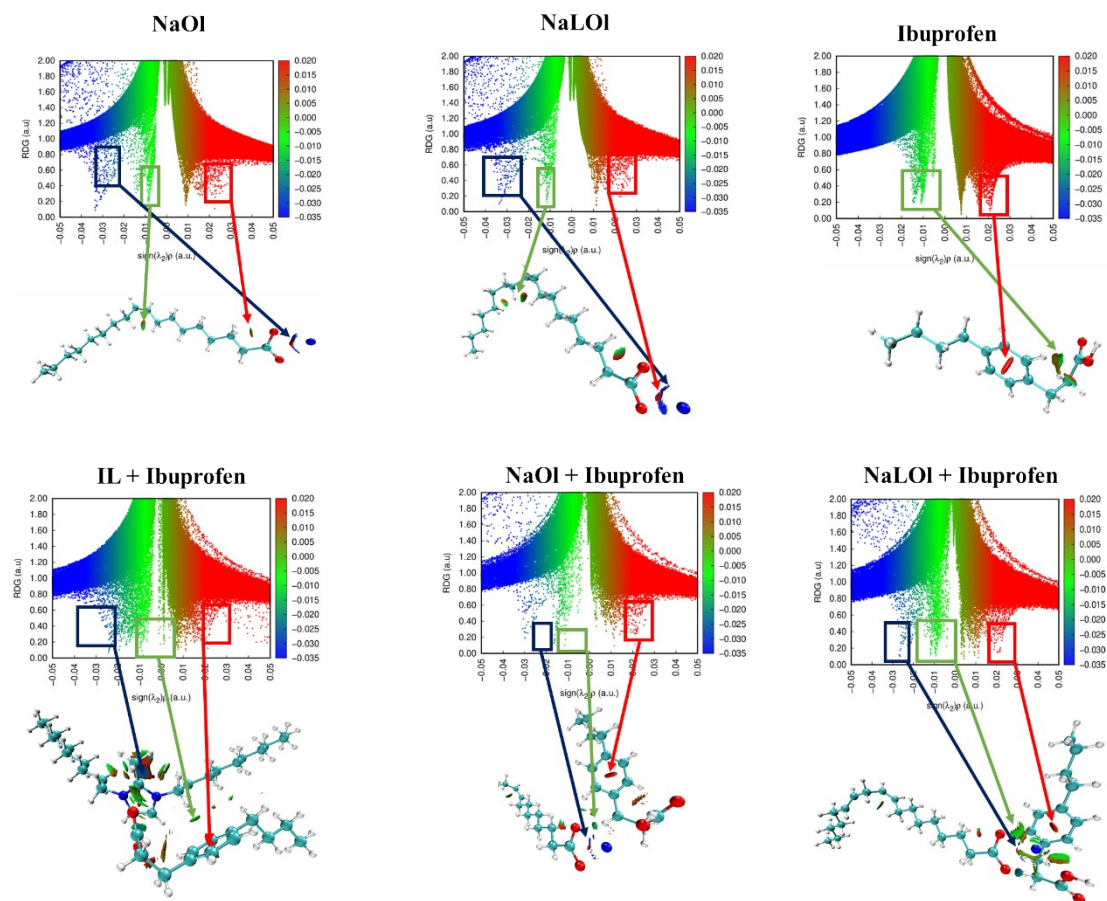

Figure S3: RDG scatter plots and NCI of the examined systems.
